# Supplementary material for: Crystal structures of glutamyl-tRNA synthetase from Elizabethkingia anopheles and E. meningosepticum
Source: PubMed Central journal article supplement (PMC9350836; doi:10.1107/s2053230x22007555), 2022-07-28

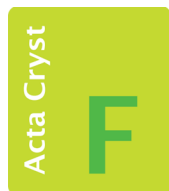

STRUCTURAL BIOLOGY  
COMMUNICATIONS

**Volume 78 (2022)**

**Supporting information for article:**

**Crystal structures of glutamyl-tRNA synthetase from  
*Elizabethkingia anopheles* and *E. meningosepticum***

**Lauryn Brooks, Sandhya Subramanian, David M. Dranow, Stephen J. Mayclin,  
Peter J. Myler and Oluwatoyin A. Asojo**

\*

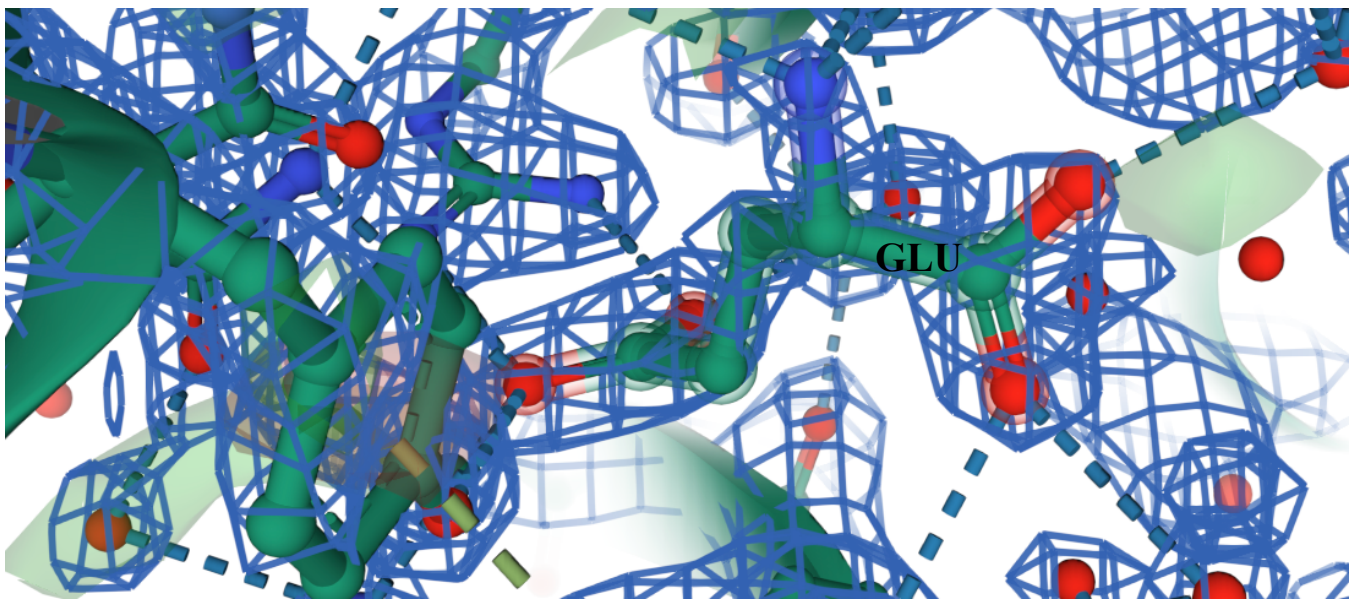

**Figure S1** Quality of final 2Fo -Fc electron density map around glutamate in 6BRL contoured at 1.5sigma cutoff

#### References

- Gouet, P., Robert, X. & Courcelle, E. (2003). *Nucleic Acids Res* **31**, 3320-3323.
- Krissinel, E. & Henrick, K. (2004). *Acta crystallographica. Section D, Biological crystallography* **60**, 2256-2268.
- Robert, X. & Gouet, P. (2014). *Nucleic Acids Res* **42**, W320-324.

Table S.1 Results from PDBeFold P (<http://www.ebi.ac.uk/msd-srv/ssm/>) analysis (Krissinel & Henrick, 2004)

PDBe Fold v2.59. (src3) 14 Apr 2014 result file.

## RESULT SUMMARY

| ## | Q-score | P-score | Z-score | RMSD  | Nalgn | Nsse | Ngaps | Seq-%  | Nmd | Nres-Q | Nsse-Q | Nres-T | Nsse-T | Query      | Target     |
|----|---------|---------|---------|-------|-------|------|-------|--------|-----|--------|--------|--------|--------|------------|------------|
| 1  | 0.8372  | 55.43   | 22.5    | 1.169 | 490   | 29   | 5     | 0.9673 | 0   | 495    | 31     | 503    | 33     | PDB 6blz:A | PDB 6brl:A |
| 2  | 0.5865  | 25.7    | 16.52   | 1.955 | 440   | 25   | 12    | 0.3841 | 0   | 495    | 31     | 468    | 29     | PDB 6blz:A | PDB 2cv1:B |
| 3  | 0.5829  | 24.7    | 16.22   | 1.998 | 442   | 27   | 15    | 0.3914 | 0   | 495    | 31     | 469    | 30     | PDB 6blz:A | PDB 1n78:B |
| 4  | 0.5814  | 26.29   | 16.67   | 1.962 | 439   | 27   | 13    | 0.385  | 0   | 495    | 31     | 469    | 31     | PDB 6blz:A | PDB 2cv2:B |
| 5  | 0.5728  | 25.58   | 16.49   | 1.905 | 432   | 25   | 14    | 0.3912 | 0   | 495    | 31     | 469    | 29     | PDB 6blz:A | PDB 2dxi:B |
| 6  | 0.569   | 25.28   | 16.9    | 1.934 | 432   | 25   | 15    | 0.3958 | 0   | 495    | 31     | 468    | 30     | PDB 6blz:A | PDB 2cv0:B |
| 7  | 0.5473  | 23.75   | 15.96   | 2.031 | 430   | 27   | 17    | 0.3767 | 0   | 495    | 31     | 468    | 31     | PDB 6blz:A | PDB 1g59:C |
| 8  | 0.5445  | 23.81   | 16.45   | 2.002 | 427   | 25   | 16    | 0.3864 | 0   | 495    | 31     | 468    | 29     | PDB 6blz:A | PDB 1n77:B |
| 9  | 0.5313  | 20.55   | 15.07   | 1.997 | 429   | 23   | 21    | 0.338  | 0   | 495    | 31     | 485    | 30     | PDB 6blz:A | PDB 2cfo:A |
| 10 | 0.5305  | 19.05   | 14.2    | 2.078 | 435   | 23   | 18    | 0.3517 | 0   | 495    | 31     | 487    | 30     | PDB 6blz:A | PDB 2cfo:B |
| 11 | 0.5241  | 19.47   | 14.68   | 2.221 | 434   | 25   | 15    | 0.3825 | 0   | 495    | 31     | 469    | 29     | PDB 6blz:A | PDB 2dxi:A |
| 12 | 0.5226  | 19.17   | 14.59   | 2.244 | 435   | 25   | 14    | 0.3839 | 0   | 495    | 31     | 469    | 29     | PDB 6blz:A | PDB 2cv2:A |
| 13 | 0.5218  | 18.96   | 14.35   | 2.362 | 443   | 27   | 16    | 0.3792 | 0   | 495    | 31     | 469    | 29     | PDB 6blz:A | PDB 1n78:A |
| 14 | 0.5208  | 19.18   | 14.59   | 2.262 | 435   | 25   | 14    | 0.3839 | 0   | 495    | 31     | 468    | 29     | PDB 6blz:A | PDB 1n77:A |
| 15 | 0.5206  | 20.96   | 14.93   | 2.321 | 440   | 25   | 15    | 0.3841 | 0   | 495    | 31     | 470    | 28     | PDB 6blz:A | PDB 2cv0:A |
| 16 | 0.5126  | 18.18   | 14.28   | 2.298 | 435   | 25   | 14    | 0.3839 | 0   | 495    | 31     | 470    | 29     | PDB 6blz:A | PDB 2cv1:A |
| 17 | 0.5115  | 17.8    | 14.17   | 2.202 | 427   | 27   | 16    | 0.3817 | 0   | 495    | 31     | 468    | 30     | PDB 6blz:A | PDB 1g59:A |
| 18 | 0.4705  | 14.57   | 13.76   | 2.351 | 427   | 23   | 17    | 0.3396 | 0   | 495    | 31     | 485    | 32     | PDB 6blz:A | PDB 3pny:B |
| 19 | 0.4683  | 17.64   | 13.94   | 2.373 | 420   | 27   | 17    | 0.3476 | 0   | 495    | 31     | 468    | 30     | PDB 6blz:A | PDB 2o5r:A |
| 20 | 0.4654  | 14.29   | 13.59   | 2.297 | 421   | 23   | 19    | 0.3444 | 0   | 495    | 31     | 485    | 31     | PDB 6blz:A | PDB 3pnv:B |
| 21 | 0.4631  | 13.1    | 12.6    | 2.636 | 436   | 27   | 17    | 0.367  | 0   | 495    | 31     | 468    | 31     | PDB 6blz:A | PDB 1gln:A |
| 22 | 0.4522  | 12.04   | 12.83   | 2.430 | 424   | 23   | 20    | 0.3349 | 0   | 495    | 31     | 485    | 30     | PDB 6blz:A | PDB 2ja2:A |
| 23 | 0.4471  | 12.01   | 13.11   | 2.446 | 421   | 24   | 23    | 0.342  | 0   | 495    | 31     | 481    | 31     | PDB 6blz:A | PDB 3pnv:A |
| 24 | 0.4353  | 14.72   | 13.2    | 2.438 | 417   | 25   | 20    | 0.3645 | 0   | 495    | 31     | 486    | 30     | PDB 6blz:A | PDB 4gri:B |
| 25 | 0.4322  | 16.79   | 14.09   | 2.313 | 400   | 23   | 15    | 0.405  | 0   | 495    | 31     | 469    | 30     | PDB 6blz:A | PDB 2cuz:A |
| 26 | 0.4298  | 10.79   | 12.69   | 2.523 | 418   | 23   | 22    | 0.3349 | 0   | 495    | 31     | 481    | 31     | PDB 6blz:A | PDB 3pny:A |
| 27 | 0.4288  | 16.7    | 14.26   | 2.298 | 397   | 23   | 15    | 0.4081 | 0   | 495    | 31     | 468    | 30     | PDB 6blz:A | PDB 1n75:A |
| 28 | 0.4228  | 14.12   | 13.53   | 2.362 | 403   | 25   | 19    | 0.3747 | 0   | 495    | 31     | 479    | 30     | PDB 6blz:A | PDB 4gri:A |
| 29 | 0.4176  | 14.84   | 13.64   | 2.326 | 394   | 24   | 16    | 0.401  | 0   | 495    | 31     | 469    | 30     | PDB 6blz:A | PDB 1j09:A |
| 30 | 0.3354  | 7.152   | 10.14   | 3.131 | 399   | 25   | 21    | 0.3434 | 0   | 495    | 31     | 459    | 28     | PDB 6blz:A | PDB 7k86:A |
| 31 | 0.3124  | 8.429   | 10.82   | 2.891 | 372   | 24   | 28    | 0.3468 | 0   | 495    | 31     | 464    | 29     | PDB 6blz:A | PDB 7k86:B |

Figure S.2 Results from ENDScript alignment (Gouet et al., 2003, Robert & Gouet, 2014)

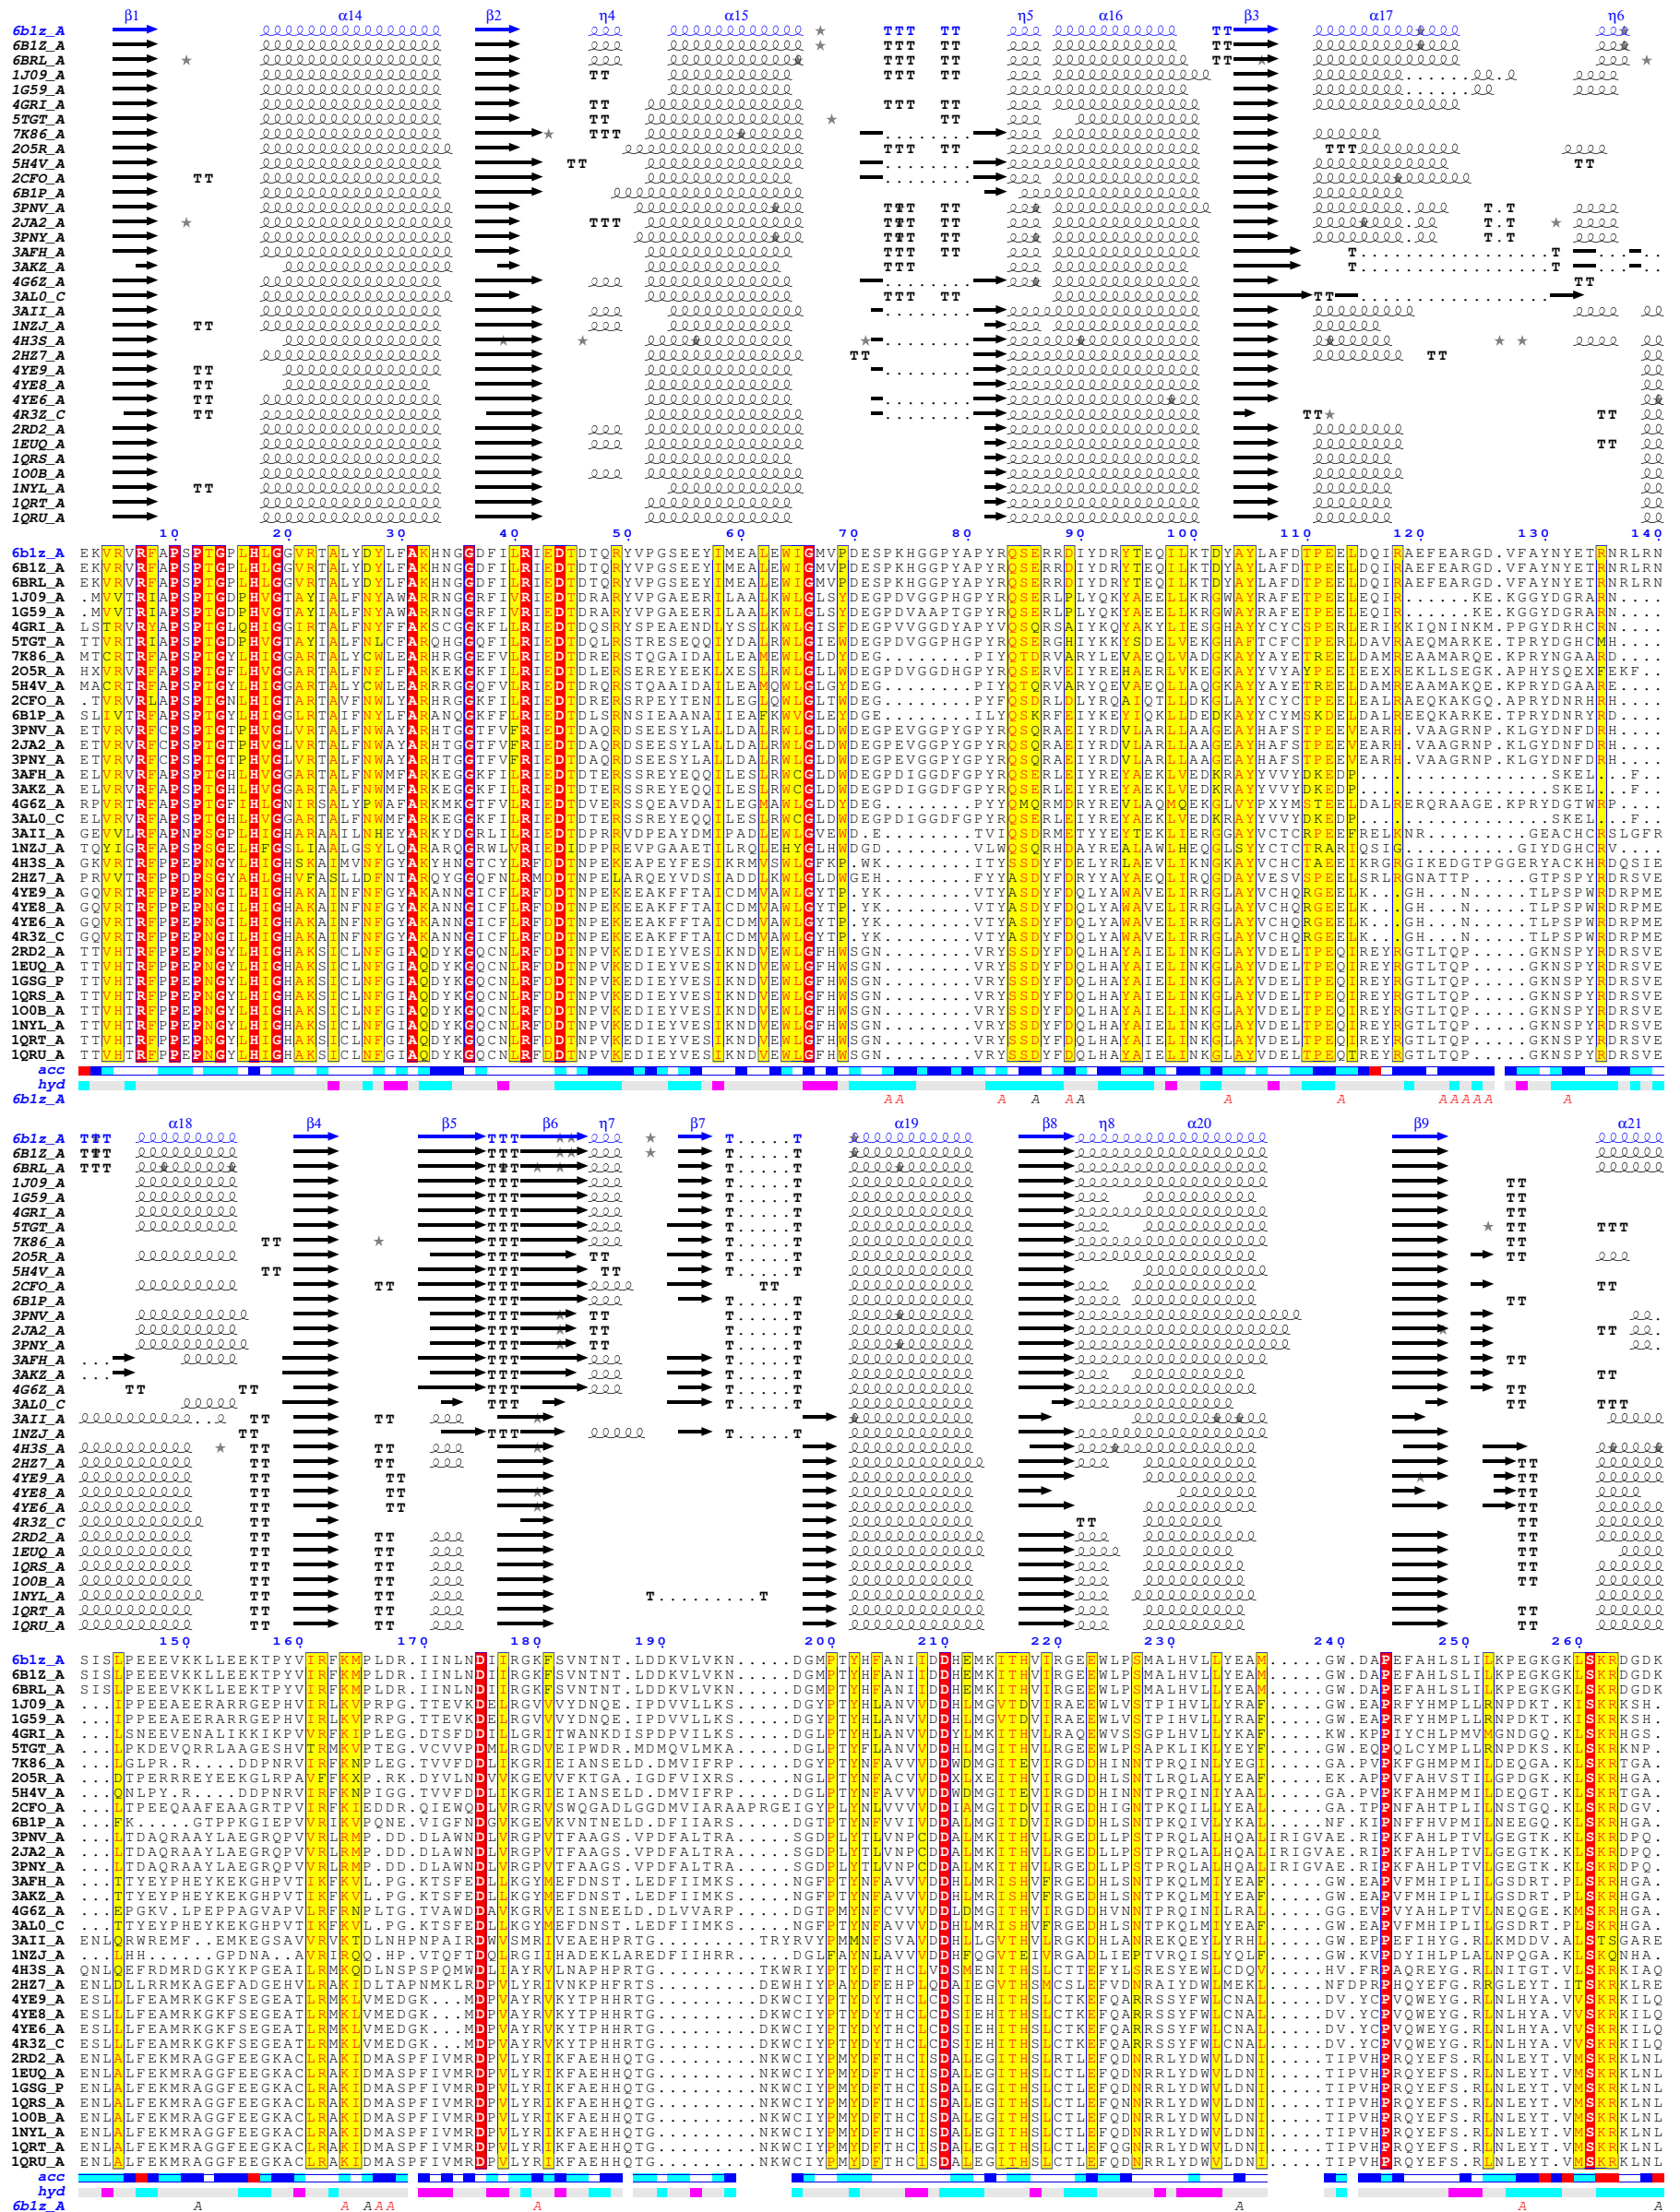



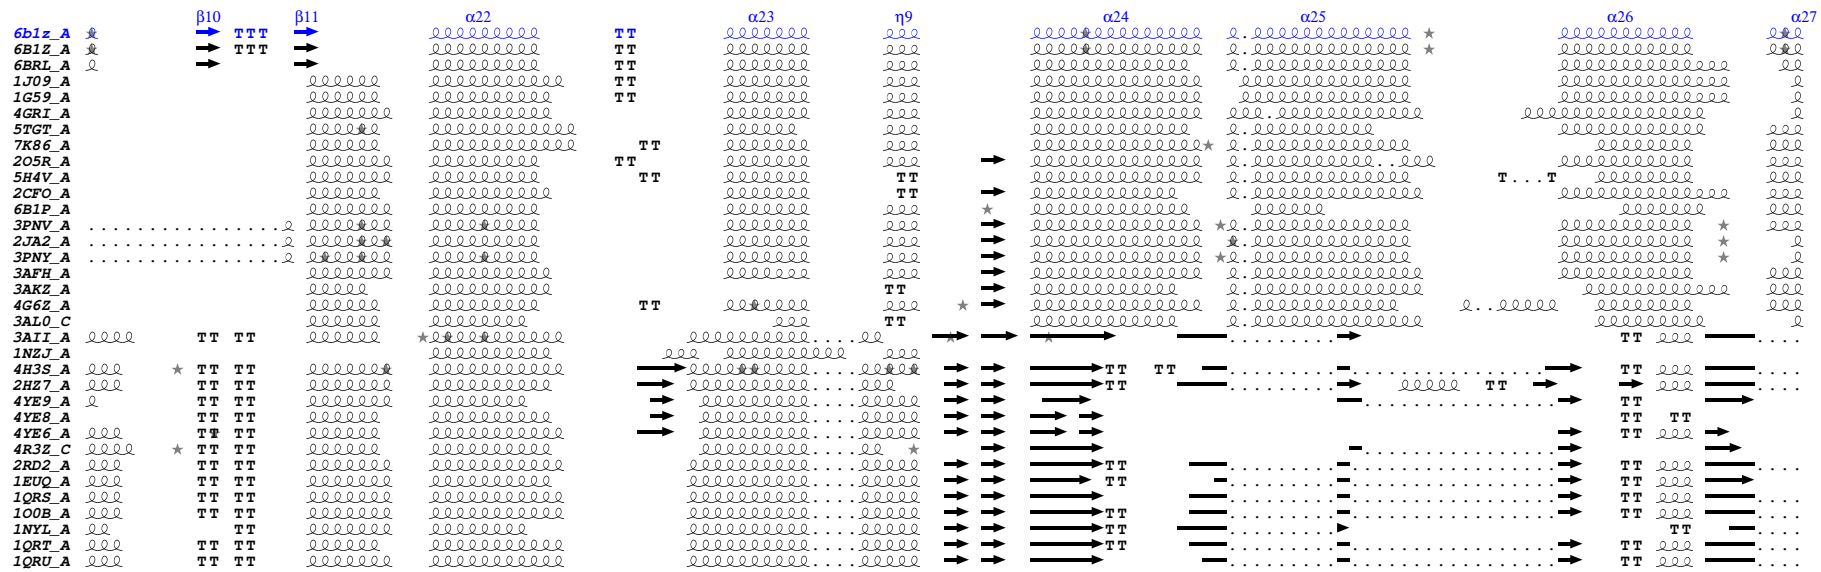

| Protein | 270              | 280    | 290   | 300   | 310   | 320  | 330   | 340   | 350   | 360    | 370    | 380    | 390 |               |
|---------|------------------|--------|-------|-------|-------|------|-------|-------|-------|--------|--------|--------|-----|---------------|
| 6b1z_A  | FGFPVFLNFTDPATGN | SAGYEG | LPPEA | INMAM | GNPAD | NKVF | VSMEM | KE... | FDLNK | HKAGRF | SAEKWF | QOYLQL | SN  | EAILPEFKKVLAE |
| 6B1Z_A  | FGFPVFLNFTDPATGN | SAGYEG | LPPEA | INMAM | GNPAD | NKVF | VSMEM | KE... | FDLNK | HKAGRF | SAEKWF | QOYLQL | SN  | EAILPEFKKVLAE |
| 6BRL_A  | FGFPVFLNFTDPATGN | SAGYEG | LPPEA | INMAM | GNPAD | NKVF | VSMEM | KE... | FDLNK | HKAGRF | SAEKWF | QOYLQL | SN  | EAILPEFKKVLAE |
| 1J09_A  | ...              | ...    | ...   | ...   | ...   | ...  | ...   | ...   | ...   | ...    | ...    | ...    | ... | ...           |
| 1G59_A  | ...              | ...    | ...   | ...   | ...   | ...  | ...   | ...   | ...   | ...    | ...    | ...    | ... | ...           |
| 4GRI_A  | ...              | ...    | ...   | ...   | ...   | ...  | ...   | ...   | ...   | ...    | ...    | ...    | ... | ...           |
| 5GT_A   | ...              | ...    | ...   | ...   | ...   | ...  | ...   | ...   | ...   | ...    | ...    | ...    | ... | ...           |
| 7K86_A  | ...              | ...    | ...   | ...   | ...   | ...  | ...   | ...   | ...   | ...    | ...    | ...    | ... | ...           |
| 205R_A  | ...              | ...    | ...   | ...   | ...   | ...  | ...   | ...   | ...   | ...    | ...    | ...    | ... | ...           |
| 5H4V_A  | ...              | ...    | ...   | ...   | ...   | ...  | ...   | ...   | ...   | ...    | ...    | ...    | ... | ...           |
| 2CFO_A  | ...              | ...    | ...   | ...   | ...   | ...  | ...   | ...   | ...   | ...    | ...    | ...    | ... | ...           |
| 6B1P_A  | ...              | ...    | ...   | ...   | ...   | ...  | ...   | ...   | ...   | ...    | ...    | ...    | ... | ...           |
| 3PNV_A  | ...              | ...    | ...   | ...   | ...   | ...  | ...   | ...   | ...   | ...    | ...    | ...    | ... | ...           |
| 2JA2_A  | ...              | ...    | ...   | ...   | ...   | ...  | ...   | ...   | ...   | ...    | ...    | ...    | ... | ...           |
| 3PNY_A  | ...              | ...    | ...   | ...   | ...   | ...  | ...   | ...   | ...   | ...    | ...    | ...    | ... | ...           |
| 3AFH_A  | ...              | ...    | ...   | ...   | ...   | ...  | ...   | ...   | ...   | ...    | ...    | ...    | ... | ...           |
| 3AKZ_A  | ...              | ...    | ...   | ...   | ...   | ...  | ...   | ...   | ...   | ...    | ...    | ...    | ... | ...           |
| 4G6Z_A  | ...              | ...    | ...   | ...   | ...   | ...  | ...   | ...   | ...   | ...    | ...    | ...    | ... | ...           |
| 3AL0_C  | ...              | ...    | ...   | ...   | ...   | ...  | ...   | ...   | ...   | ...    | ...    | ...    | ... | ...           |
| 3AI1_A  | ...              | ...    | ...   | ...   | ...   | ...  | ...   | ...   | ...   | ...    | ...    | ...    | ... | ...           |
| 1NZJ_A  | ...              | ...    | ...   | ...   | ...   | ...  | ...   | ...   | ...   | ...    | ...    | ...    | ... | ...           |
| 4H3S_A  | ...              | ...    | ...   | ...   | ...   | ...  | ...   | ...   | ...   | ...    | ...    | ...    | ... | ...           |
| 2H27_A  | ...              | ...    | ...   | ...   | ...   | ...  | ...   | ...   | ...   | ...    | ...    | ...    | ... | ...           |
| 4YE9_A  | ...              | ...    | ...   | ...   | ...   | ...  | ...   | ...   | ...   | ...    | ...    | ...    | ... | ...           |
| 4YE8_A  | ...              | ...    | ...   | ...   | ...   | ...  | ...   | ...   | ...   | ...    | ...    | ...    | ... | ...           |
| 4YE6_A  | ...              | ...    | ...   | ...   | ...   | ...  | ...   | ...   | ...   | ...    | ...    | ...    | ... | ...           |
| 4R3Z_C  | ...              | ...    | ...   | ...   | ...   | ...  | ...   | ...   | ...   | ...    | ...    | ...    | ... | ...           |
| 2RD2_A  | ...              | ...    | ...   | ...   | ...   | ...  | ...   | ...   | ...   | ...    | ...    | ...    | ... | ...           |
| 1EUQ_A  | ...              | ...    | ...   | ...   | ...   | ...  | ...   | ...   | ...   | ...    | ...    | ...    | ... | ...           |
| 1QRS_A  | ...              | ...    | ...   | ...   | ...   | ...  | ...   | ...   | ...   | ...    | ...    | ...    | ... | ...           |
| 100B_A  | ...              | ...    | ...   | ...   | ...   | ...  | ...   | ...   | ...   | ...    | ...    | ...    | ... | ...           |
| 1NYL_A  | ...              | ...    | ...   | ...   | ...   | ...  | ...   | ...   | ...   | ...    | ...    | ...    | ... | ...           |
| 1QRT_A  | ...              | ...    | ...   | ...   | ...   | ...  | ...   | ...   | ...   | ...    | ...    | ...    | ... | ...           |
| 1QRU_A  | ...              | ...    | ...   | ...   | ...   | ...  | ...   | ...   | ...   | ...    | ...    | ...    | ... | ...           |

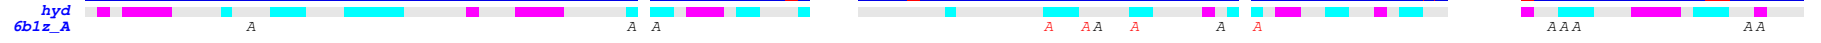

| Protein | 400      | 410   | 420       | 430         | 440      | 450   |
|---------|----------|-------|-----------|-------------|----------|-------|
| 6b1z_A  | IYNDGKFF | HAPES | DEKASKKAX | ...XXXXAVL  | ...ELTEA | ISSLD |
| 6B1Z_A  | IYNDGKFF | HAPES | DEKASKKAW | ...SPETAVAL | ...ELTEA | ISSLD |
| 6BRL_A  | IYNDGKFF | HAPES | DEKASKKAW | ...SPETAVAL | ...ELTEA | ISSLD |
| 1J09_A  | ...      | ...   | ...       | ...         | ...      | ...   |
| 1G59_A  | ...      | ...   | ...       | ...         | ...      | ...   |
| 4GRI_A  | ...      | ...   | ...       | ...         | ...      | ...   |
| 5GT_A   | ...      | ...   | ...       | ...         | ...      | ...   |
| 7K86_A  | ...      | ...   | ...       | ...         | ...      | ...   |
| 205R_A  | ...      | ...   | ...       | ...         | ...      | ...   |
| 5H4V_A  | ...      | ...   | ...       | ...         | ...      | ...   |
| 2CFO_A  | ...      | ...   | ...       | ...         | ...      | ...   |
| 6B1P_A  | ...      | ...   | ...       | ...         | ...      | ...   |
| 3PNV_A  | ...      | ...   | ...       | ...         | ...      | ...   |
| 2JA2_A  | ...      | ...   | ...       | ...         | ...      | ...   |
| 3PNY_A  | ...      | ...   | ...       | ...         | ...      | ...   |
| 3AFH_A  | ...      | ...   | ...       | ...         | ...      | ...   |
| 3AKZ_A  | ...      | ...   | ...       | ...         | ...      | ...   |
| 4G6Z_A  | ...      | ...   | ...       | ...         | ...      | ...   |
| 3AL0_C  | ...      | ...   | ...       | ...         | ...      | ...   |
| 3AI1_A  | ...      | ...   | ...       | ...         | ...      | ...   |
| 1NZJ_A  | ...      | ...   | ...       | ...         | ...      | ...   |
| 4H3S_A  | ...      | ...   | ...       | ...         | ...      | ...   |
| 2H27_A  | ...      | ...   | ...       | ...         | ...      | ...   |
| 4YE9_A  | ...      | ...   | ...       | ...         | ...      | ...   |
| 4YE8_A  | ...      | ...   | ...       | ...         | ...      | ...   |
| 4YE6_A  | ...      | ...   | ...       | ...         | ...      | ...   |
| 4R3Z_C  | ...      | ...   | ...       | ...         | ...      | ...   |
| 2RD2_A  | ...      | ...   | ...       | ...         | ...      | ...   |
| 1EUQ_A  | ...      | ...   | ...       | ...         | ...      | ...   |
| 1QRS_A  | ...      | ...   | ...       | ...         | ...      | ...   |
| 100B_A  | ...      | ...   | ...       | ...         | ...      | ...   |
| 1NYL_A  | ...      | ...   | ...       | ...         | ...      | ...   |
| 1QRT_A  | ...      | ...   | ...       | ...         | ...      | ...   |
| 1QRU_A  | ...      | ...   | ...       | ...         | ...      | ...   |

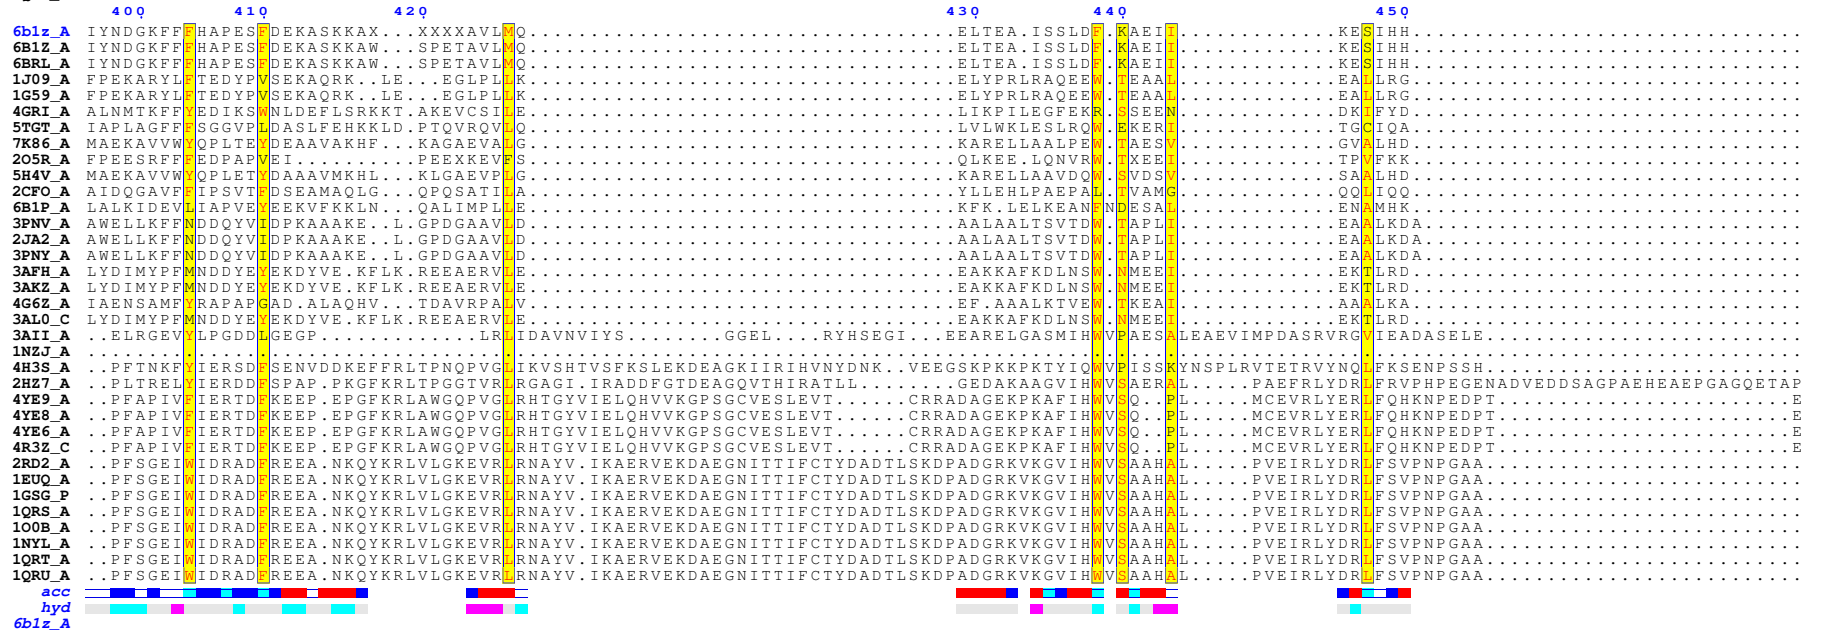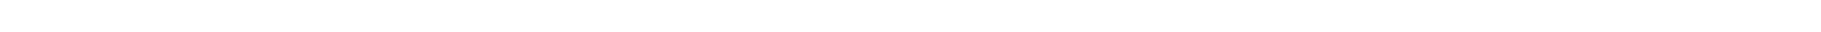

Supplement: f-78-00306-sup1.pdf [file f-78-00306-sup1.pdf]
